# Supplementary material for: Use of a bioinformatic-assisted primer design strategy to establish a new nested PCR-based method for Cryptosporidium
Source: PubMed Central journal article supplement (PMC5654123; doi:10.1186/s13071-017-2462-4), 2017-10-23
Supplement: 13071_2017_2462_MOESM2_ESM.pdf [file 13071_2017_2462_MOESM2_ESM.pdf]

Genomic alignment tracks for the *LSU2040F*, *LSU2055F*, *LSU2557R*, and *LSU3020R* genes. The tracks show sequence alignments for various species including *AF040725\_c\_parvum*, *JR620100009\_c\_hominis*, *D9899727\_c\_muris*, *J1RBL0100144\_c\_balleii*, *J1RBL0100002\_c\_mlesegridis*, *JX8N0100055\_c\_chipmunk\_genotype*, *CBN001002483\_Eimeria\_tennella*, *F0326276\_Marine\_dinoflagellate*, *AF509331\_Perkinsus\_olseni*, *AF509332\_Perkinsus\_chesapeakei*, *H425049\_Viurella\_brassicafornis*, *KF651084\_Colpomenia\_vietnamica*, and *KF159286\_Colpodelia\_angusta*. Each track includes a consensus sequence and a coverage plot below the alignment. The alignment shows high sequence conservation across the species, with some variations in the 3' UTR region.
